# Supplementary material
Source: PubMed Central journal article supplement (PMC5480515)

Figure S1

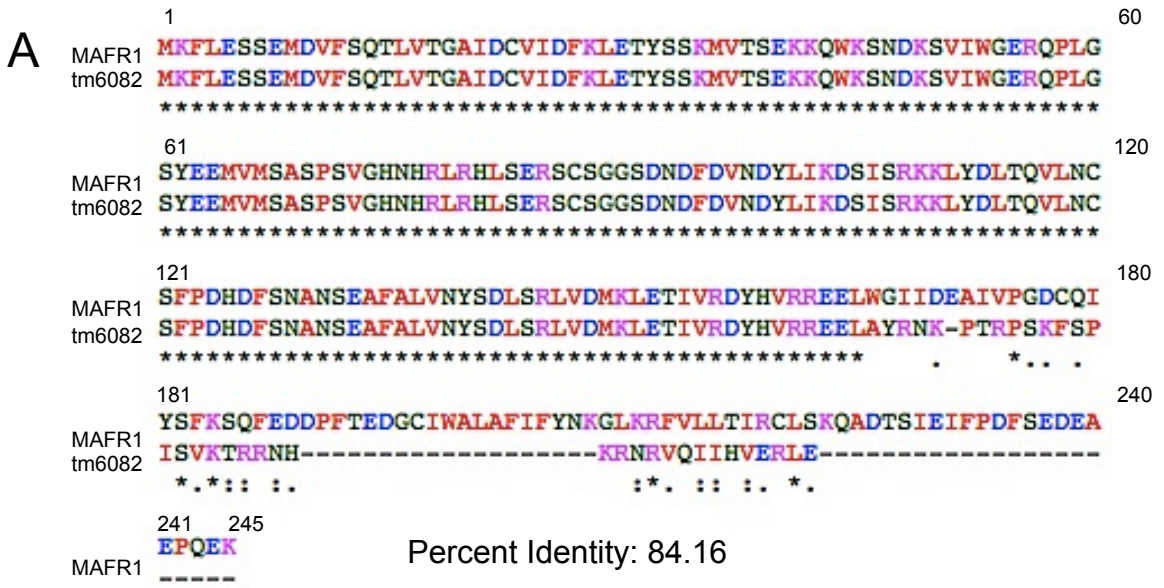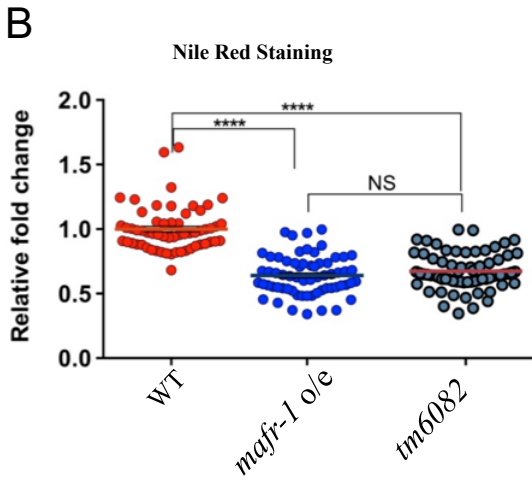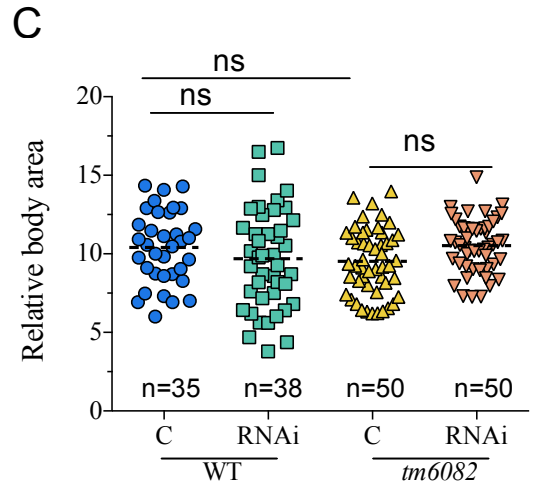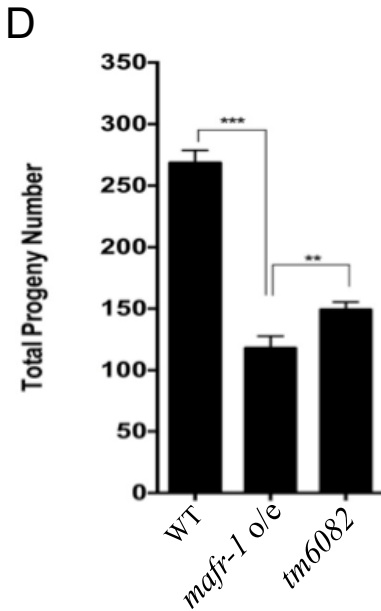

Figure S2

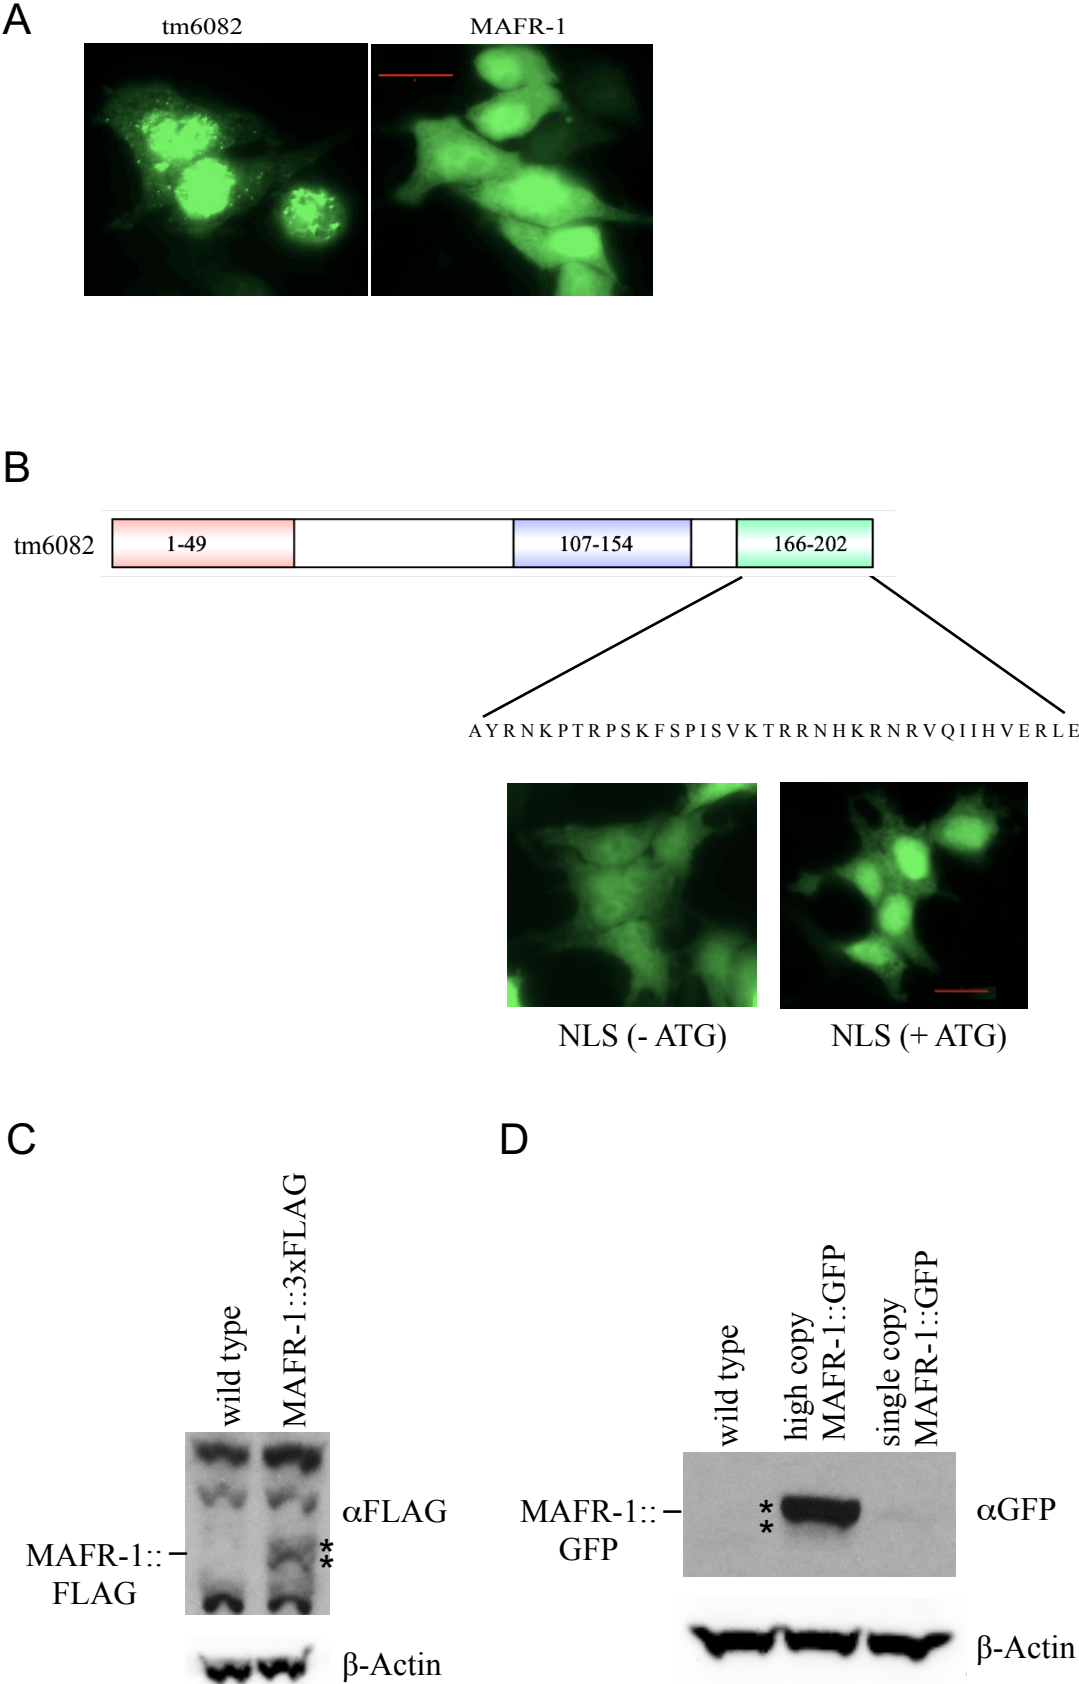

Figure S3

**A**

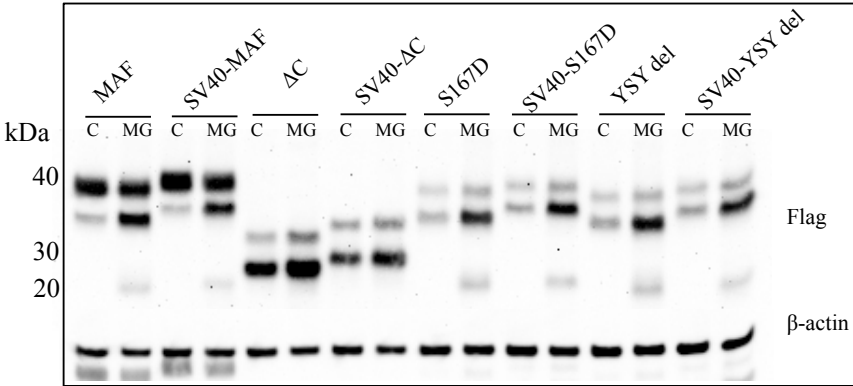

**B**

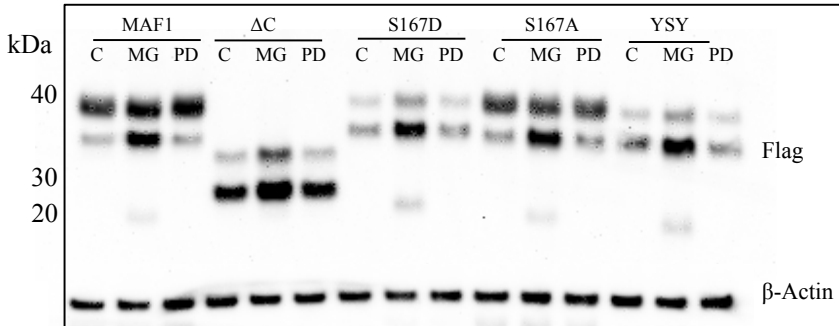

**C**

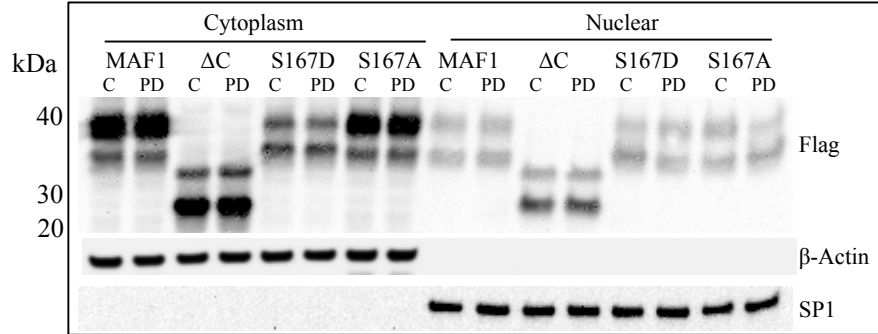

Figure S4

A

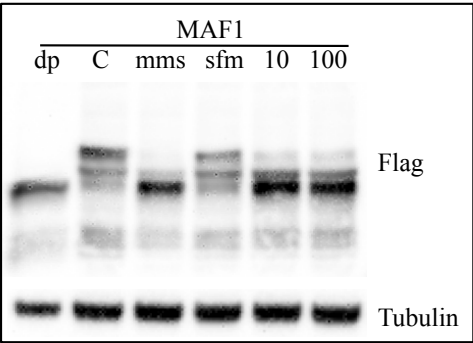

B

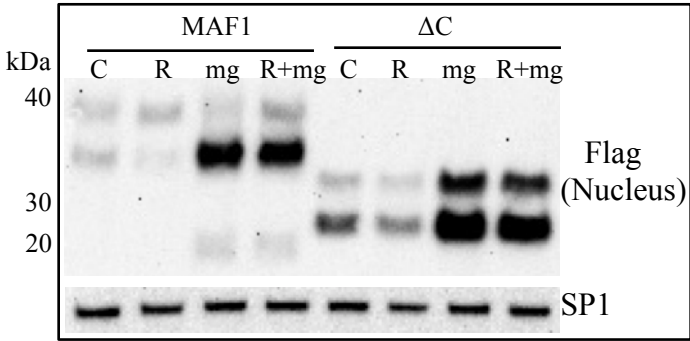

C

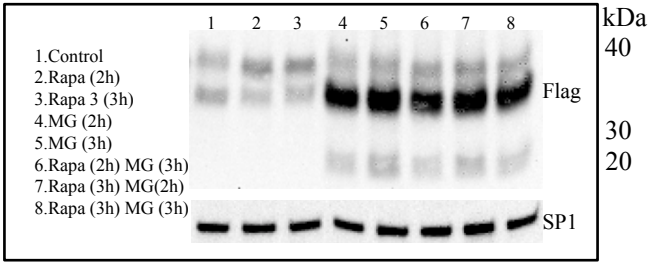

Figure S5

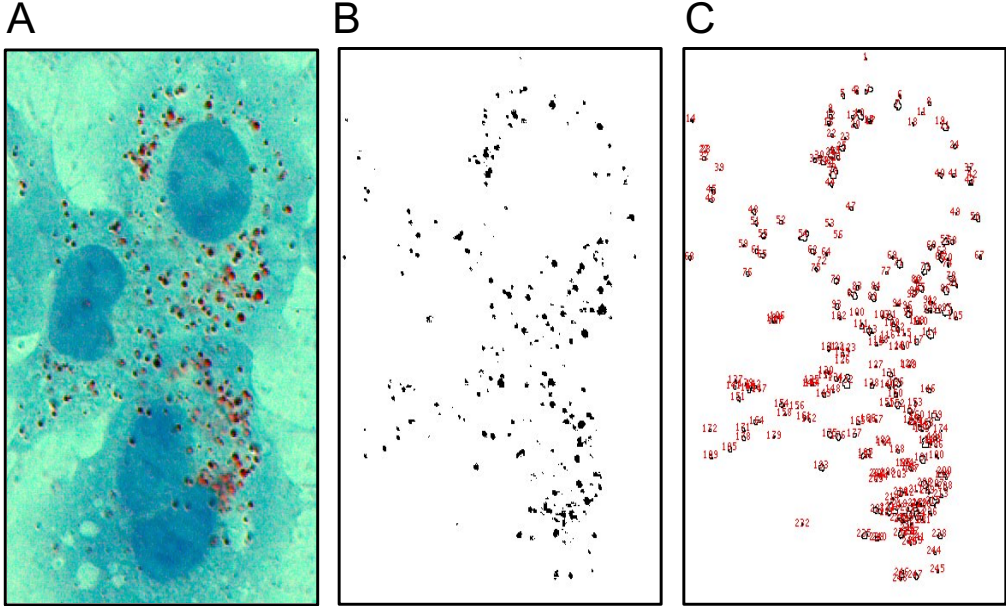

Figure S6

A

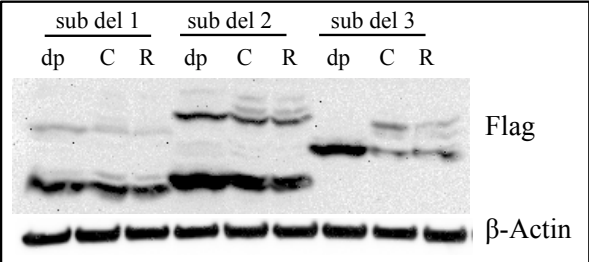

B

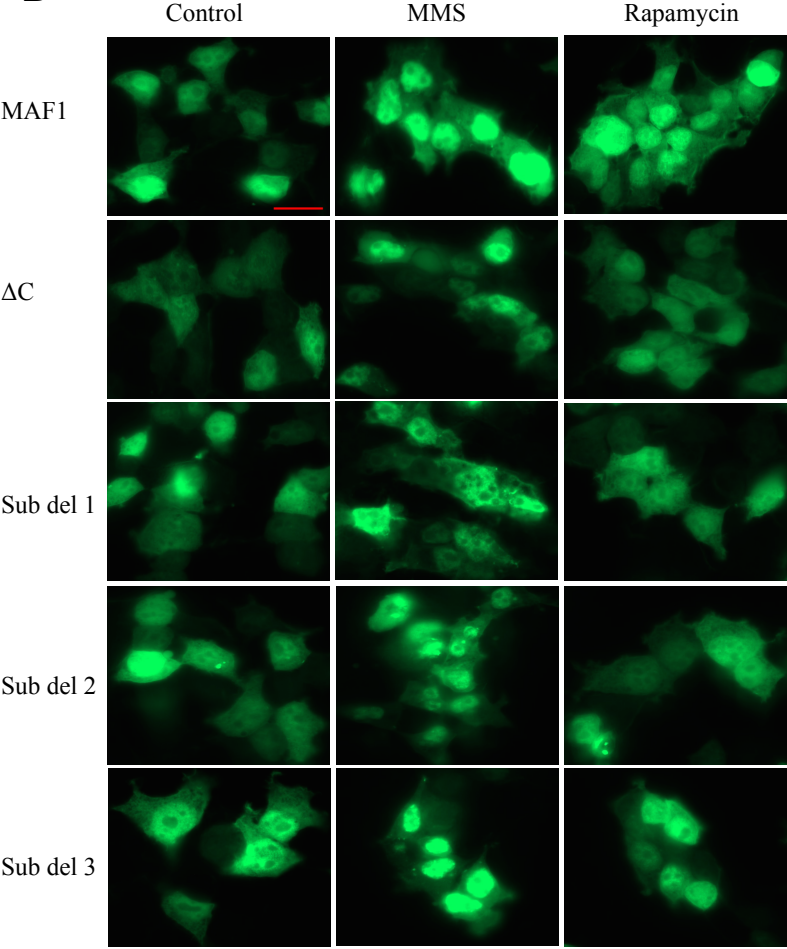

C

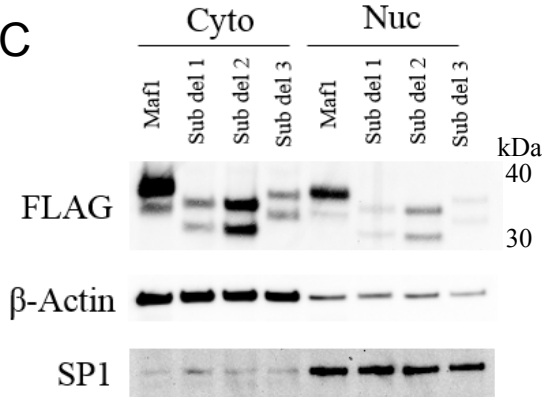

Figure S7

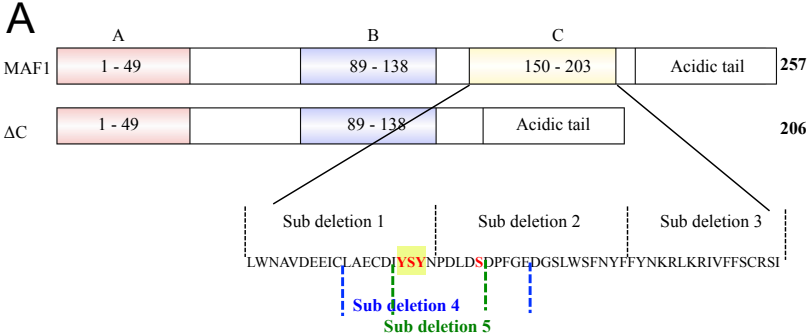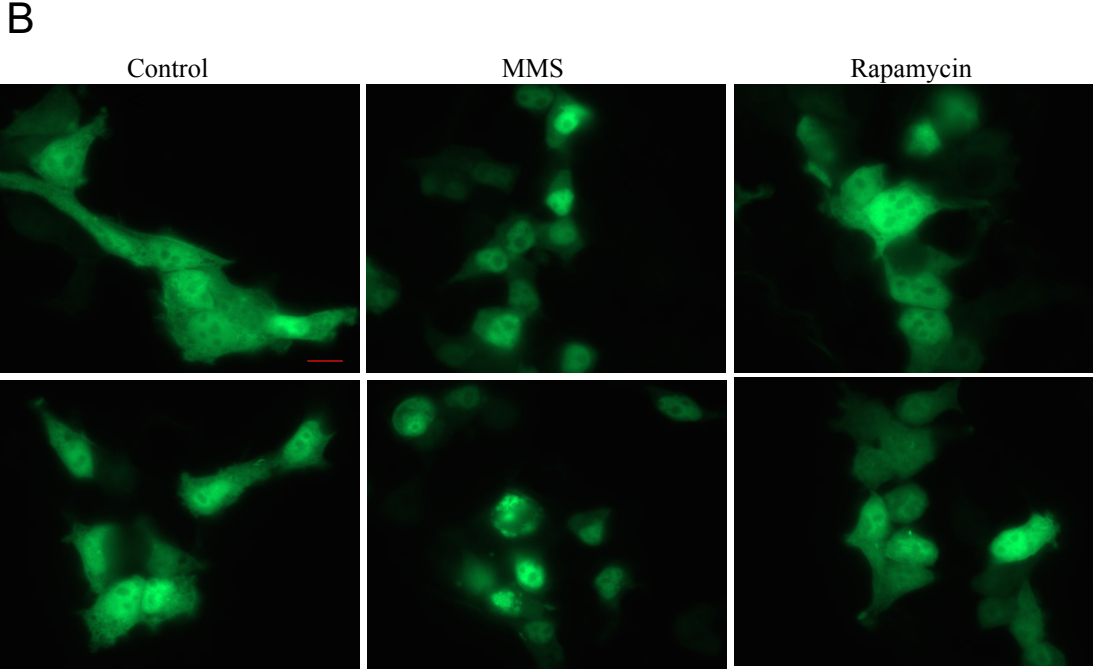

Figure S8

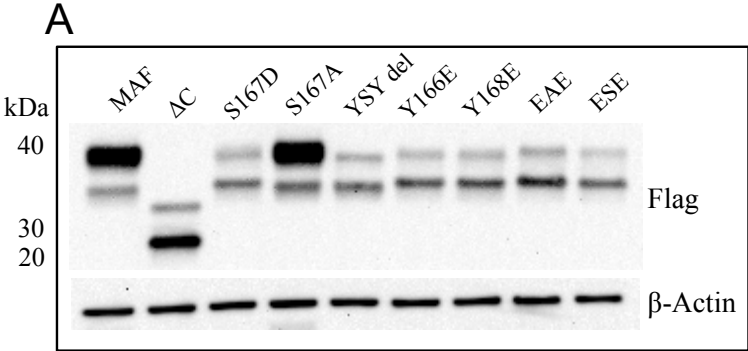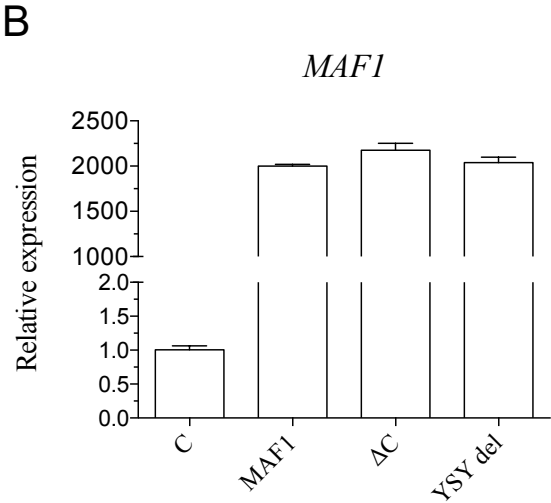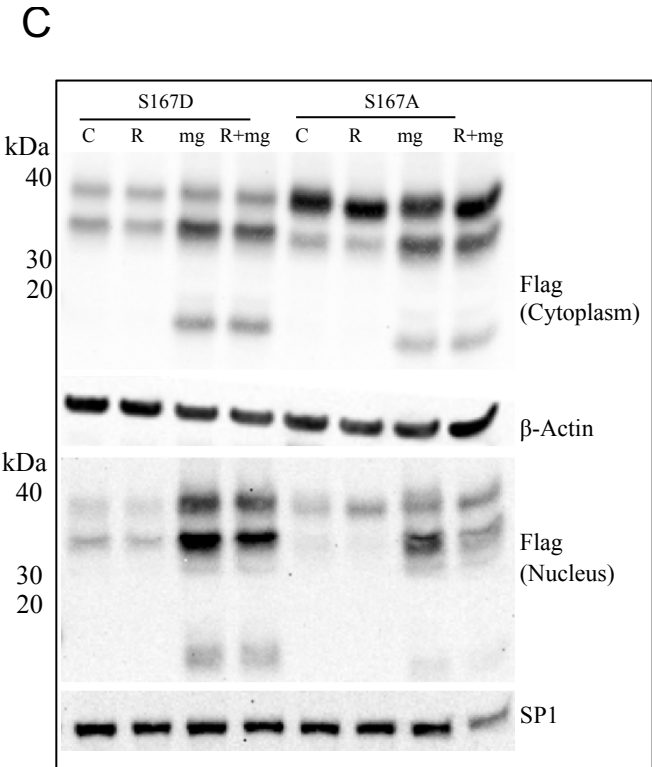



Figure S9

A

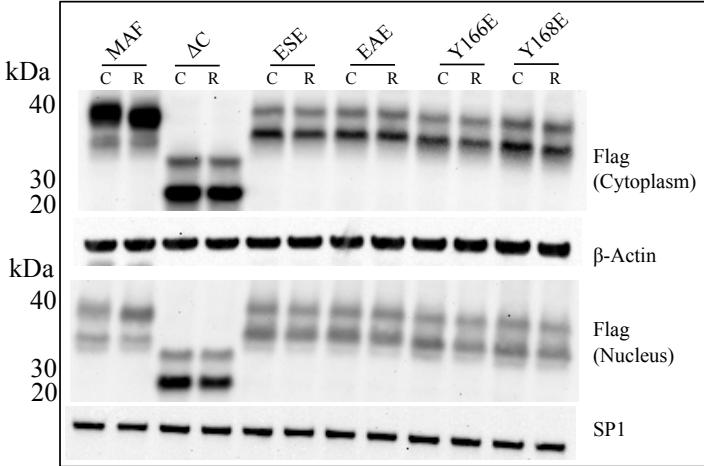

B

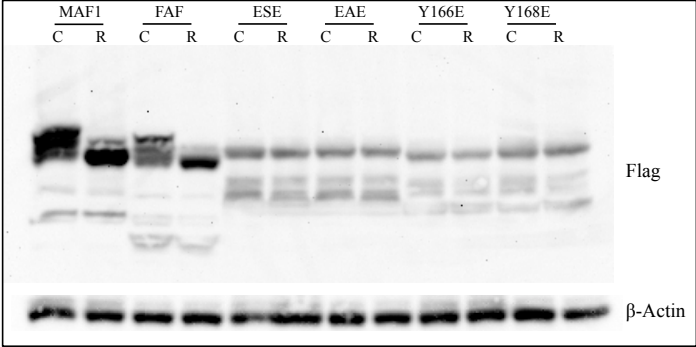

C

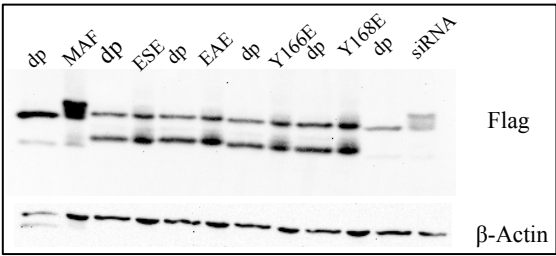

Figure S10

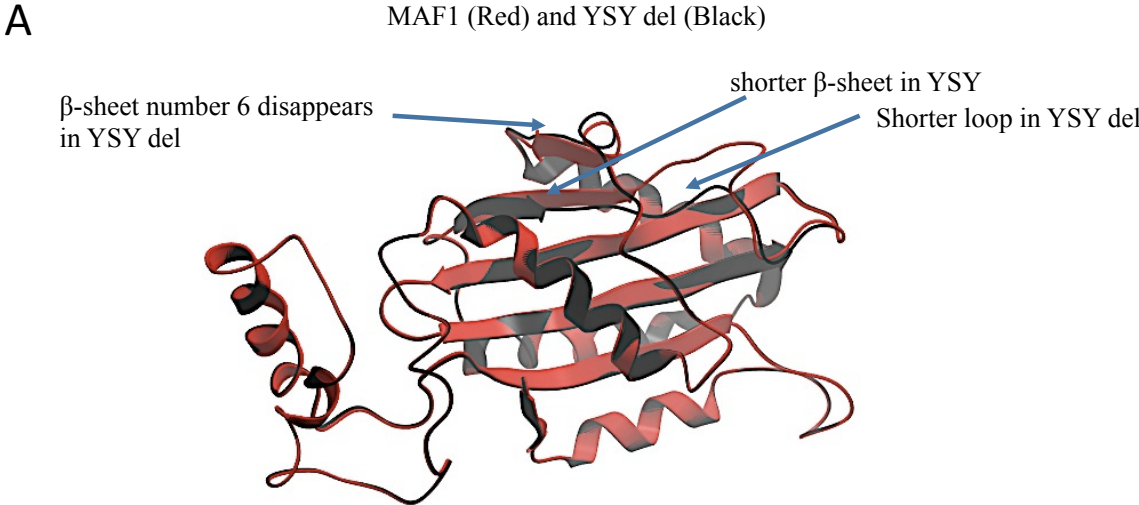

Solvent surface for only part of  $\Delta$ C region (LWNAVDEEICLAECDIYSYNPDLSD)  
MAF-1 shows higher solvent surface area for residues after YSY (NPDLSD)

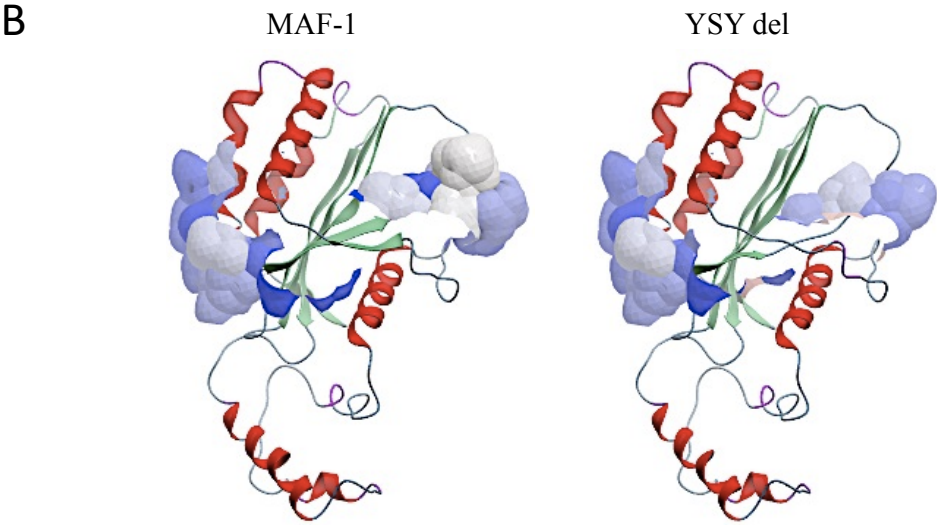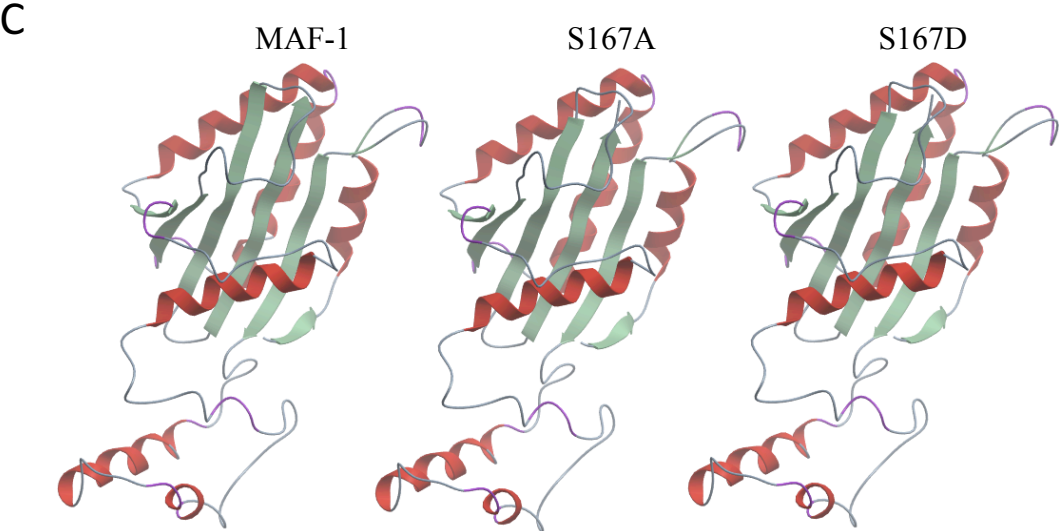

Figure S11

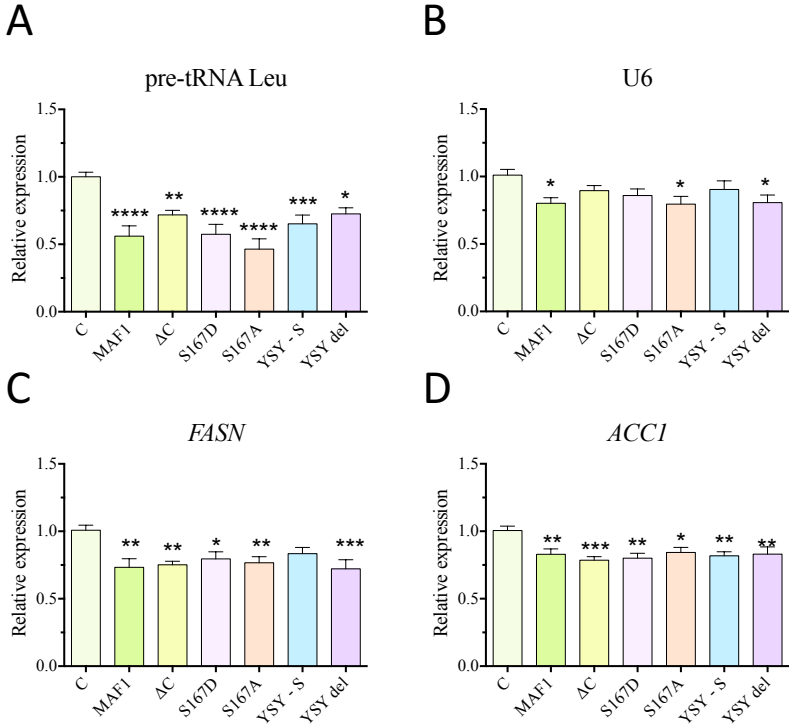

Figure S12

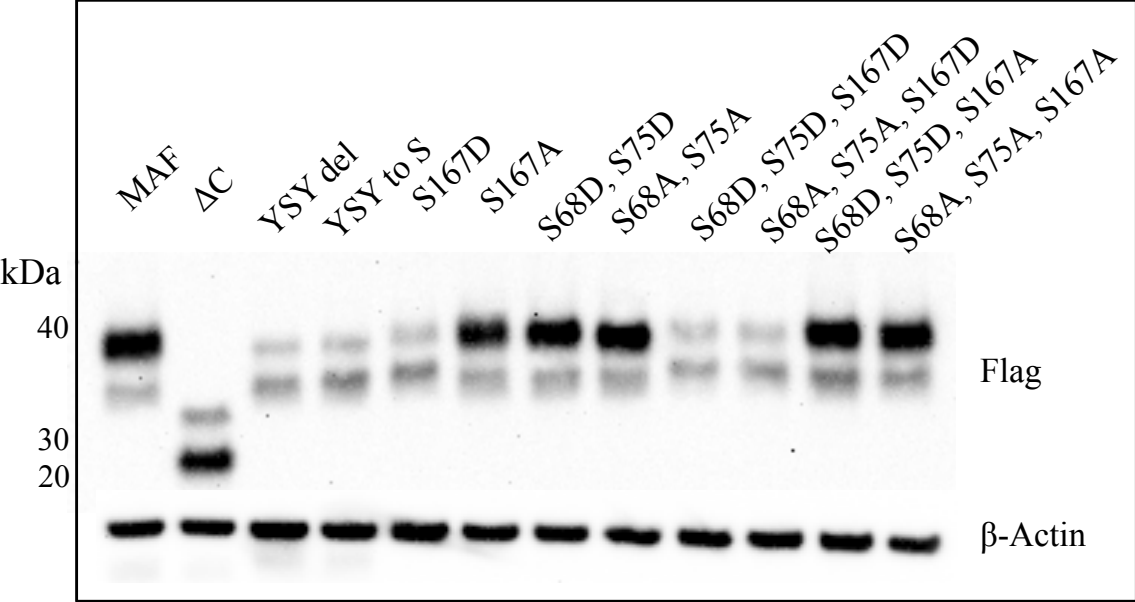

Figure S13

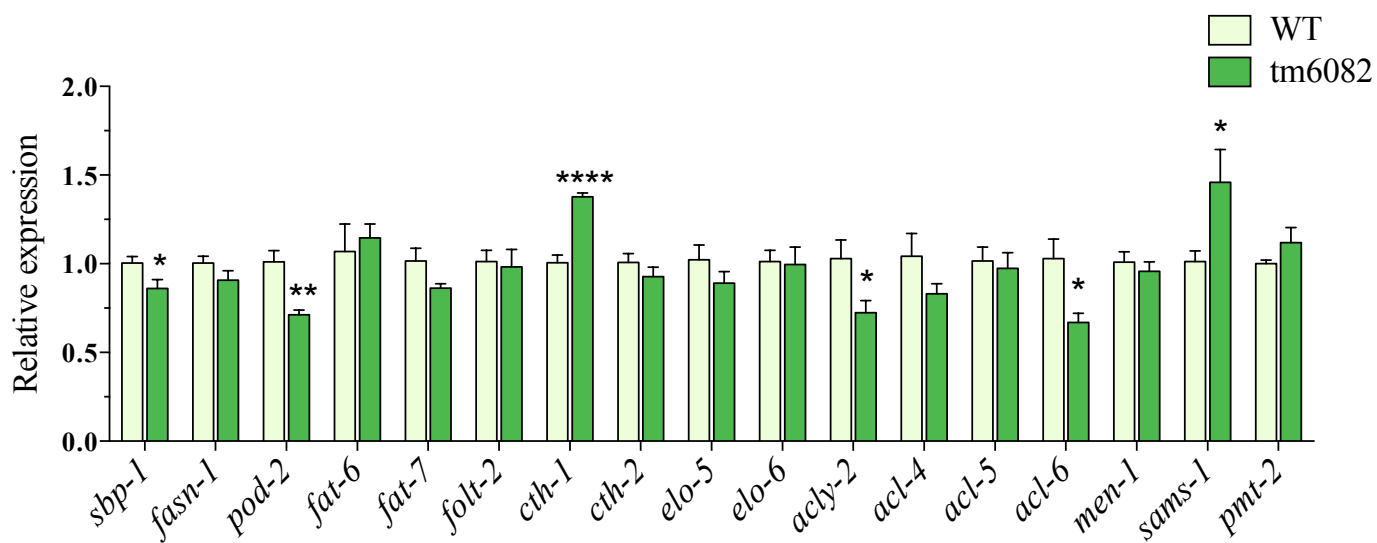

Supplement: NIHMS864469-supplement-sup.pdf [file NIHMS864469-supplement-sup.pdf]
